# Supplementary material for: Synthesis, Biological Evaluation, and Structure–Activity Relationships of 4-Aminopiperidines as Novel Antifungal Agents Targeting Ergosterol Biosynthesis
Source: MDPI journal article supplement (doi:10.3390/molecules26237208), 2021-11-28
Supplement: s1 [file s1]

**Supporting Information Table S2.** Identification of the target enzyme(s) in cholesterol biosynthesis. Mainly accumulating sterols under incubation at different concentrations, and identified target enzymes; () trivial name; n.d. not determined

| Compound                        | Mainly accumulating sterol(s)                                                                                                                                                                                                                                                                                                                                                                                                                                                     | Inhibited enzyme(s)                                                                                                                                                     |
|---------------------------------|-----------------------------------------------------------------------------------------------------------------------------------------------------------------------------------------------------------------------------------------------------------------------------------------------------------------------------------------------------------------------------------------------------------------------------------------------------------------------------------|-------------------------------------------------------------------------------------------------------------------------------------------------------------------------|
| <b>Amorolfine hydrochloride</b> | 0.1 $\mu$ M: cholesta-8,14-dien-3 $\beta$ -ol<br>1 $\mu$ M: cholesta-8,14-dien-3 $\beta$ -ol<br>10 $\mu$ M: cholesta-8,14-dien-3 $\beta$ -ol                                                                                                                                                                                                                                                                                                                                      | 0.1 $\mu$ M: sterol C14-reductase, sterol C8-isomerase<br>1 $\mu$ M: sterol C14-reductase, sterol C8-isomerase<br>10 $\mu$ M: sterol C14-reductase, sterol C8-isomerase |
| <b>2b</b>                       | 0.1 $\mu$ M: cholesta-8,14-dien-3 $\beta$ -ol<br>1 $\mu$ M: cholesta-8,14-dien-3 $\beta$ -ol, cholesta-8-en-3 $\beta$ -ol (zymostenol), cholesta-5,7-dien-3 $\beta$ -ol (7-dehydrocholesterol), cholesta-7-en-3 $\beta$ -ol (lathosterol);<br>10 $\mu$ M: toxic                                                                                                                                                                                                                   | 0.1 $\mu$ M: sterol C14-reductase, sterol C8-isomerase<br>1 $\mu$ M: multi-enzyme inhibition<br>10 $\mu$ M: n.d.                                                        |
| <b>2c</b>                       | 0.1 $\mu$ M: cholesta-8,14-dien-3 $\beta$ -ol, cholesta-8-en-3 $\beta$ -ol (zymostenol), cholesta-5,7-dien-3 $\beta$ -ol (7-dehydrocholesterol), cholesta-7-en-3 $\beta$ -ol (lathosterol)<br>1 $\mu$ M: cholesta-8,14-dien-3 $\beta$ -ol, cholesta-8-en-3 $\beta$ -ol (zymostenol), cholesta-5,7-dien-3 $\beta$ -ol (7-dehydrocholesterol), cholesta-7-en-3 $\beta$ -ol (lathosterol);<br>10 $\mu$ M: cholesta-8,14-dien-3 $\beta$ -ol, cholesta-8-en-3 $\beta$ -ol (zymostenol) | 0.1 $\mu$ M: multi-enzyme inhibition<br>1 $\mu$ M: multi-enzyme inhibition<br>10 $\mu$ M: sterol C14-reductase, sterol C8-isomerase                                     |
| <b>2f</b>                       | 0.1 $\mu$ M: cholesta-8,14-dien-3 $\beta$ -ol, cholesta-8-en-3 $\beta$ -ol (zymostenol)<br>21 $\mu$ M: cholesta-8,14-dien-3 $\beta$ -ol, cholesta-8-en-3 $\beta$ -ol (zymostenol), cholesta-5,7-dien-3 $\beta$ -ol (7-dehydrocholesterol), cholesta-7-en-3 $\beta$ -ol (lathosterol);<br>10 $\mu$ M: cholesta-8,14-dien-3 $\beta$ -ol, cholesta-8-en-3 $\beta$ -ol (zymostenol)                                                                                                   | 0.1 $\mu$ M: sterol C14-reductase, sterol C8-isomerase<br>1 $\mu$ M: multi-enzyme inhibition<br>10 $\mu$ M: sterol C14-reductase, sterol C8-isomerase                   |
| <b>2g</b>                       | 0.1 $\mu$ M: no accumulation;<br>1 $\mu$ M: no accumulation;<br>10 $\mu$ M: no accumulation                                                                                                                                                                                                                                                                                                                                                                                       | 0.1 $\mu$ M: n.d.<br>1 $\mu$ M: n.d.<br>10 $\mu$ M: n.d.                                                                                                                |
| <b>3b</b>                       | 0.1 $\mu$ M: no accumulation;<br>1 $\mu$ M: cholesta-8,14-dien-3 $\beta$ -ol, cholesta-8-en-3 $\beta$ -ol (zymostenol), cholesta-5,7-dien-3 $\beta$ -ol (7-dehydrocholesterol), cholesta-7-en-3 $\beta$ -ol (lathosterol);<br>10 $\mu$ M: toxic                                                                                                                                                                                                                                   | 0.1 $\mu$ M: n.d.<br>1 $\mu$ M: multi-enzyme inhibition<br>10 $\mu$ M: n.d.                                                                                             |
| <b>4b</b>                       | 0.1 $\mu$ M: no accumulation;<br>1 $\mu$ M: cholesta-8,14-dien-3 $\beta$ -ol, cholesta-8-en-3 $\beta$ -ol (zymostenol), cholesta-5,7-dien-3 $\beta$ -ol (7-dehydrocholesterol), cholesta-7-en-3 $\beta$ -ol (lathosterol);<br>10 $\mu$ M: toxic                                                                                                                                                                                                                                   | 0.1 $\mu$ M: n.d.<br>1 $\mu$ M: multi-enzyme inhibition<br>10 $\mu$ M: n.d.                                                                                             |
| <b>4c</b>                       | 0.1 $\mu$ M: no accumulation;<br>1 $\mu$ M: cholesta-8,14-dien-3 $\beta$ -ol;<br>10 $\mu$ M: cholesta-8,14-dien-3 $\beta$ -ol                                                                                                                                                                                                                                                                                                                                                     | 0.1 $\mu$ M: n.d.<br>1 $\mu$ M: sterol C14-reductase, sterol C8-isomerase<br>10 $\mu$ M: sterol C14-reductase, sterol C8-isomerase                                      |
| <b>5b</b>                       | 0.1 $\mu$ M: no accumulation;<br>1 $\mu$ M: cholesta-8,14-dien-3 $\beta$ -ol, cholesta-8-en-3 $\beta$ -ol (zymostenol), cholesta-5,7-dien-3 $\beta$ -ol (7-dehydrocholesterol), cholesta-7-en-3 $\beta$ -ol (lathosterol);<br>10 $\mu$ M: toxic                                                                                                                                                                                                                                   | 0.1 $\mu$ M: n.d.<br>1 $\mu$ M: multi-enzyme inhibition<br>10 $\mu$ M: n.d.                                                                                             |
| <b>6b</b>                       | 0.1 $\mu$ M: cholesta-8-en-3 $\beta$ -ol (zymostenol), cholesta-7-en-3 $\beta$ -ol (lathosterol)<br>1 $\mu$ M: cholesta-8-en-3 $\beta$ -ol (zymostenol), cholesta-7-en-3 $\beta$ -ol (lathosterol)<br>10 $\mu$ M: cholesta-8-en-3 $\beta$ -ol (zymostenol), cholesta-7-en-3 $\beta$ -ol (lathosterol)                                                                                                                                                                             | 0.1 $\mu$ M: multi-enzyme inhibition<br>1 $\mu$ M: multi-enzyme inhibition<br>10 $\mu$ M: multi-enzyme inhibition                                                       |
