# Supplementary material for: Synthesis, Biological Evaluation, and Structure–Activity Relationships of 4-Aminopiperidines as Novel Antifungal Agents Targeting Ergosterol Biosynthesis
Source: MDPI journal article supplement (doi:10.3390/molecules26237208), 2021-11-28
Supplement: s1 [file s1]

**Supporting Information Table S1.** Overview of synthesized compounds and antifungal activity screening on *Yarrowia lipolytica*; n.d. not determined. Reference antifungals: amorolfine hydrochloride, terbinafine hydrochloride, posaconazole, voriconazole.

| Name                      | Structure                                                                                                                                                                                             | Formula                                                    | Molecular weight [g/mol] | MIC [ $\mu\text{g/mL}$ ] |
|---------------------------|-------------------------------------------------------------------------------------------------------------------------------------------------------------------------------------------------------|------------------------------------------------------------|--------------------------|--------------------------|
| Amorolfine hydrochloride  | 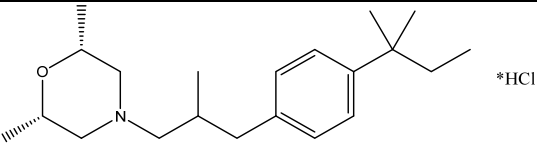<br><chem>CC(C)(C)C1=CC=C(C(C)(C)C)C=C1CCN2CC[C@H](C)O2.Cl</chem>                                                   | $\text{C}_{21}\text{H}_{35}\text{NO}$                      | 317.52                   | 0.6                      |
| Terbinafine hydrochloride | <br><chem>CC(C)(C)C#CC=CCN1CC[C@H](C1)C2=CC=CC=C3C=CC=CC23.Cl</chem>                                                | $\text{C}_{21}\text{H}_{25}\text{N}$                       | 291.44                   | 0.4                      |
| Posaconazole              | <br><chem>CC(C)(C)C#CC=CCN1CC[C@H](C1)C2=CC=CC=C3C=CC=CC23O[C@H]4C[C@@H](C5=CC=CC=C5F)O[C@H](C6=CC=CC=C6F)C4</chem> | $\text{C}_{37}\text{H}_{42}\text{F}_2\text{N}_8\text{O}_4$ | 700.79                   | 0.8                      |
| Voriconazole              | <br><chem>CC(C)(C)C#CC=CCN1CC[C@H](C1)C2=CC=CC=C3C=CC=CC23O[C@H]4C[C@@H](C5=CC=CC=C5F)O[C@H](C6=CC=CC=C6F)C4</chem> | $\text{C}_{16}\text{H}_{14}\text{F}_3\text{N}_5\text{O}$   | 349.32                   | 0.4                      |

| Name | Structure                                                                           | Formula                                        | Molecular weight<br>[g/mol] | MIC<br>[μg/mL] |
|------|-------------------------------------------------------------------------------------|------------------------------------------------|-----------------------------|----------------|
| 2a   | 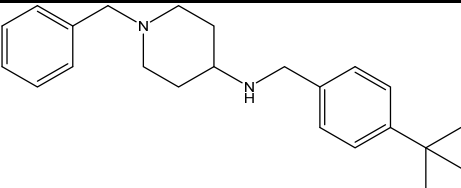   | C <sub>23</sub> H <sub>32</sub> N <sub>2</sub> | 336.26                      | 10             |
| 2b   |   | C <sub>24</sub> H <sub>42</sub> N <sub>2</sub> | 358.61                      | 2              |
| 2c   |   | C <sub>20</sub> H <sub>34</sub> N <sub>2</sub> | 302.51                      | 25             |
| 2d   |    | C <sub>16</sub> H <sub>26</sub> N <sub>2</sub> | 246.40                      | >200           |
| 2e   |    | C <sub>18</sub> H <sub>30</sub> N <sub>2</sub> | 274.45                      | >200           |
| 2f   |   | C <sub>19</sub> H <sub>30</sub> N <sub>2</sub> | 286.46                      | >200           |
| 2g   |  | C <sub>20</sub> H <sub>26</sub> N <sub>2</sub> | 294.21                      | >200           |

| Name | Structure                                                                            | Formula                                        | Molecular weight [g/mol] | MIC [ $\mu\text{g/mL}$ ] |
|------|--------------------------------------------------------------------------------------|------------------------------------------------|--------------------------|--------------------------|
| 2h   | 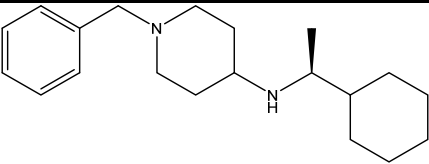    | $\text{C}_{20}\text{H}_{32}\text{N}_2$         | 300.49                   | >200                     |
| 2i   |    | $\text{C}_{20}\text{H}_{25}\text{ClN}_2$       | 328.17                   | 100                      |
| 2j   |     | $\text{C}_{20}\text{H}_{26}\text{N}_2\text{O}$ | 310.44                   | >200                     |
| 3a   |     | $\text{C}_{17}\text{H}_{28}\text{N}_2$         | 260.23                   | 200                      |
| 3b   |   | $\text{C}_{25}\text{H}_{44}\text{N}_2$         | 372.64                   | 0.8                      |
| 3c   |  | $\text{C}_{24}\text{H}_{34}\text{N}_2$         | 350.55                   | 5                        |

| Name | Structure                                                                           | Formula                                          | Molecular weight [g/mol] | MIC [ $\mu\text{g/mL}$ ] |
|------|-------------------------------------------------------------------------------------|--------------------------------------------------|--------------------------|--------------------------|
| 3d   | 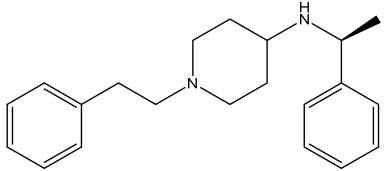   | $\text{C}_{21}\text{H}_{28}\text{N}_2$           | 308.47                   | >200                     |
| 3e   |    | $\text{C}_{21}\text{H}_{34}\text{N}_2$           | 314.27                   | >200                     |
| 3f   |   | $\text{C}_{21}\text{H}_{27}\text{ClN}_2$         | 342.91                   | 50                       |
| 3g   |  | $\text{C}_{19}\text{H}_{32}\text{N}_2$           | 288.48                   | 75                       |
| 4a   |  | $\text{C}_{21}\text{H}_{34}\text{N}_2\text{O}_2$ | 346.26                   | 25                       |

| Name | Structure                                                                           | Formula                                                       | Molecular weight<br>[g/mol] | MIC<br>[μg/mL] |
|------|-------------------------------------------------------------------------------------|---------------------------------------------------------------|-----------------------------|----------------|
| 4b   | 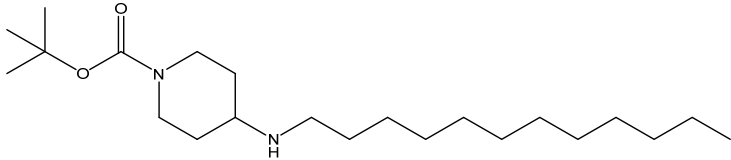  | C <sub>22</sub> H <sub>44</sub> N <sub>2</sub> O <sub>2</sub> | 368.34                      | 3              |
| 4c   |   | C <sub>18</sub> H <sub>36</sub> N <sub>2</sub> O <sub>2</sub> | 312.28                      | 75             |
| 4d   |    | C <sub>17</sub> H <sub>32</sub> N <sub>2</sub> O <sub>2</sub> | 296.24                      | >200           |
| 4e   |   | C <sub>16</sub> H <sub>25</sub> N <sub>3</sub> O <sub>2</sub> | 291.19                      | >200           |
| 4f   |  | C <sub>16</sub> H <sub>31</sub> N <sub>3</sub> O <sub>2</sub> | 297.44                      | >200           |
| 5a   |  | C <sub>16</sub> H <sub>26</sub> N <sub>2</sub>                | 246.21                      | 150            |

| Name | Structure                                                                            | Formula                                        | Molecular weight [g/mol] | MIC [ $\mu\text{g/mL}$ ] |
|------|--------------------------------------------------------------------------------------|------------------------------------------------|--------------------------|--------------------------|
| 5b   | 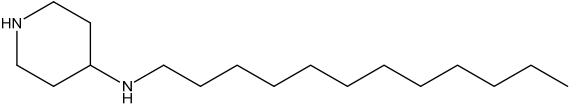   | $\text{C}_{17}\text{H}_{36}\text{N}_2$         | 268.29                   | 5                        |
| 5c   |     | $\text{C}_{13}\text{H}_{28}\text{N}_2$         | 212.23                   | >200                     |
| 5e   |     | $\text{C}_{11}\text{H}_{17}\text{N}_3$         | 191.14                   | >200                     |
| 5f   |     | $\text{C}_{11}\text{H}_{23}\text{N}_3$         | 197.19                   | >200                     |
| 6a   |   | $\text{C}_{27}\text{H}_{46}\text{N}_2\text{O}$ | 414.36                   | 75                       |
| 6b   |  | $\text{C}_{36}\text{H}_{54}\text{N}_2\text{O}$ | 530.42                   | >200                     |

| Name | Structure                                                                            | Formula                                        | Molecular weight [g/mol] | MIC [ $\mu\text{g/mL}$ ] |
|------|--------------------------------------------------------------------------------------|------------------------------------------------|--------------------------|--------------------------|
| 6c   | 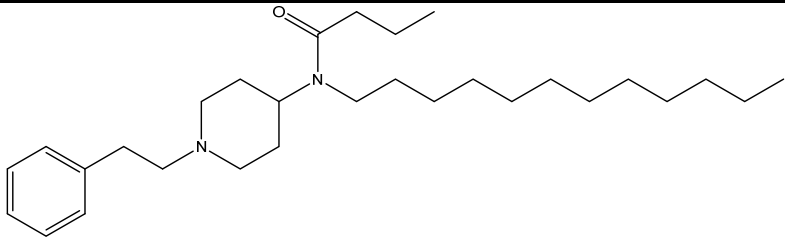   | $\text{C}_{29}\text{H}_{50}\text{N}_2\text{O}$ | 442.39                   | >200                     |
| 6d   |    | $\text{C}_{34}\text{H}_{50}\text{N}_2\text{O}$ | 502.39                   | >200                     |
| 6e   |   | $\text{C}_{37}\text{H}_{50}\text{N}_2\text{O}$ | 538.39                   | >200                     |
| 6f   |  | $\text{C}_{28}\text{H}_{48}\text{N}_2\text{O}$ | 428.38                   | >200                     |

| Name | Structure                                                                           | Formula                                | Molecular weight [g/mol] | MIC [ $\mu\text{g/mL}$ ] |
|------|-------------------------------------------------------------------------------------|----------------------------------------|--------------------------|--------------------------|
| 7a   | 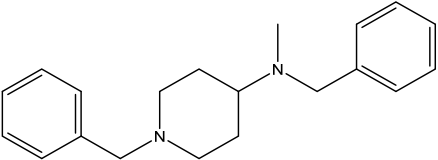   | $\text{C}_{20}\text{H}_{26}\text{N}_2$ | 294.21                   | >200                     |
| 7b   |    | $\text{C}_{21}\text{H}_{28}\text{N}_2$ | 308.47                   | >200                     |
| 8d   |   | $\text{C}_{34}\text{H}_{54}\text{N}_2$ | 490.43                   | 75                       |
| 8e   |  | $\text{C}_{37}\text{H}_{52}\text{N}_2$ | 524.41                   | >200                     |
