# Supplementary material for: Synthesis, Biological Evaluation, and Structure–Activity Relationships of 4-Aminopiperidines as Novel Antifungal Agents Targeting Ergosterol Biosynthesis
Source: MDPI journal article supplement (doi:10.3390/molecules26237208), 2021-11-28

**Supporting Information Figure S1.** Exemplary antifungal activity of **2b**, **3b** and amorolfine hydrochloride (**A**) against the two major fungal pathogens, *Aspergillus fumigatus* and *Candida albicans*. MFCs were determined after confrontation of fungal spores with antifungal substances for 24 h. Yellow boxes represent MIC values, while green boxes represent the MFCs determined for each substance

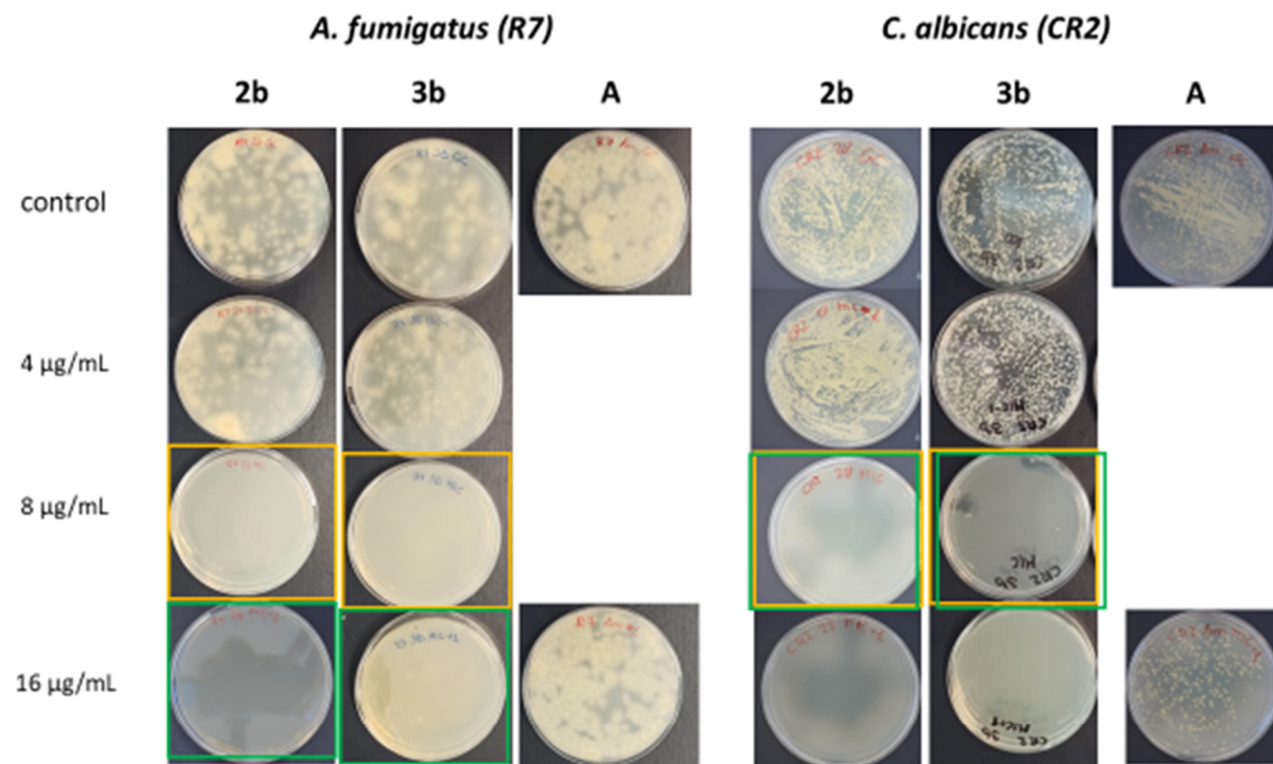

Supplement: s1 [file s1]
