# Supplementary material for: Synthesis, Biological Evaluation, and Structure–Activity Relationships of 4-Aminopiperidines as Novel Antifungal Agents Targeting Ergosterol Biosynthesis
Source: MDPI journal article supplement (doi:10.3390/molecules26237208), 2021-11-28
Supplement: s1 [file s1]

**Supporting Information Table S3:** Fungal strains used in this study.

| species                          | strain ID                                                                                            |
|----------------------------------|------------------------------------------------------------------------------------------------------|
| <i>Aspergillus fumigatus</i>     | A65<br>R16=ATTC46645<br>900566/2016<br>901580/2013<br>920895 (I)/2015<br>R7=ATCC204305               |
| <i>Aspergillus terreus</i>       | T155<br>T65<br>T73<br>T36<br>T98<br>R15= MYA3633                                                     |
| <i>Aspergillus flavus</i>        | 508978/2014<br>902400/2012=FL50<br>901074/2013<br>901104/2013<br>900151/2012=FL29<br>R8= ATCC 204304 |
| <i>Mucormycetes</i>              |                                                                                                      |
| <i>Rhizopus microsporus</i>      | AS73                                                                                                 |
| <i>Rhizopus arrhizus</i>         | LunD3                                                                                                |
| <i>Rhizopus microsporus</i>      | 11 14                                                                                                |
| <i>Lichtheimia ramosa</i>        | 11 11                                                                                                |
| <i>Apophysomyces elegans</i>     | VPCI 14                                                                                              |
| <i>Mucor circinelloides</i>      | VPCI 19                                                                                              |
| <i>Syncephalastrum racemosum</i> | VPCI 8                                                                                               |
| <i>Lichtheimia corymbifera</i>   | 07 10                                                                                                |
| <i>Candida albicans</i>          | 17046452<br>17046508<br>17047778<br>19082249<br>19082941<br>CR2=ATCC 90028                           |
| <i>Candida glabrata</i>          | 17043820<br>17132978<br>18094734<br>19101275<br>19161510<br>CG2<br>CR4=ATTC 90030                    |
| <i>Candida tropicalis</i>        | 17090801<br>19082746<br>19161237/2016<br>24453/2016<br>27612<br>CR8 = ATCC 90874                     |
| <i>Candida krusei</i>            | 80<br>623/5<br>BK60<br>14<br>461298/2016<br>CR9=ATCC 6258                                            |
| <i>Candida auris</i>             | Sc1                                                                                                  |
| <i>Yarrowia lipolytica</i>       | 78-003                                                                                               |
